# Supplementary material for: Stability trends in carbocation intermediates stemming from germacrene A and hedycaryol
Source: publisher site journal article supplement (doi:10.3762/bjoc.20.101), 2024-05-23
Supplement: Additional file 1 [file 1860-5397-20-101-S1.pdf]

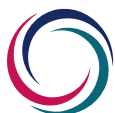

## Supporting Information

for

### Stability trends in carbocation intermediates stemming from germacrene A and hedycaryol

Naziha Tarannam, Prashant Kumar Gupta, Shani Zev and Dan Thomas Major

*Beilstein J. Org. Chem.* **2024**, *20*, 1189–1197. [doi:10.3762/bjoc.20.101](https://doi.org/10.3762/bjoc.20.101)

### Additional figures and Cartesian coordinates for germacrene A and hedycaryol cations

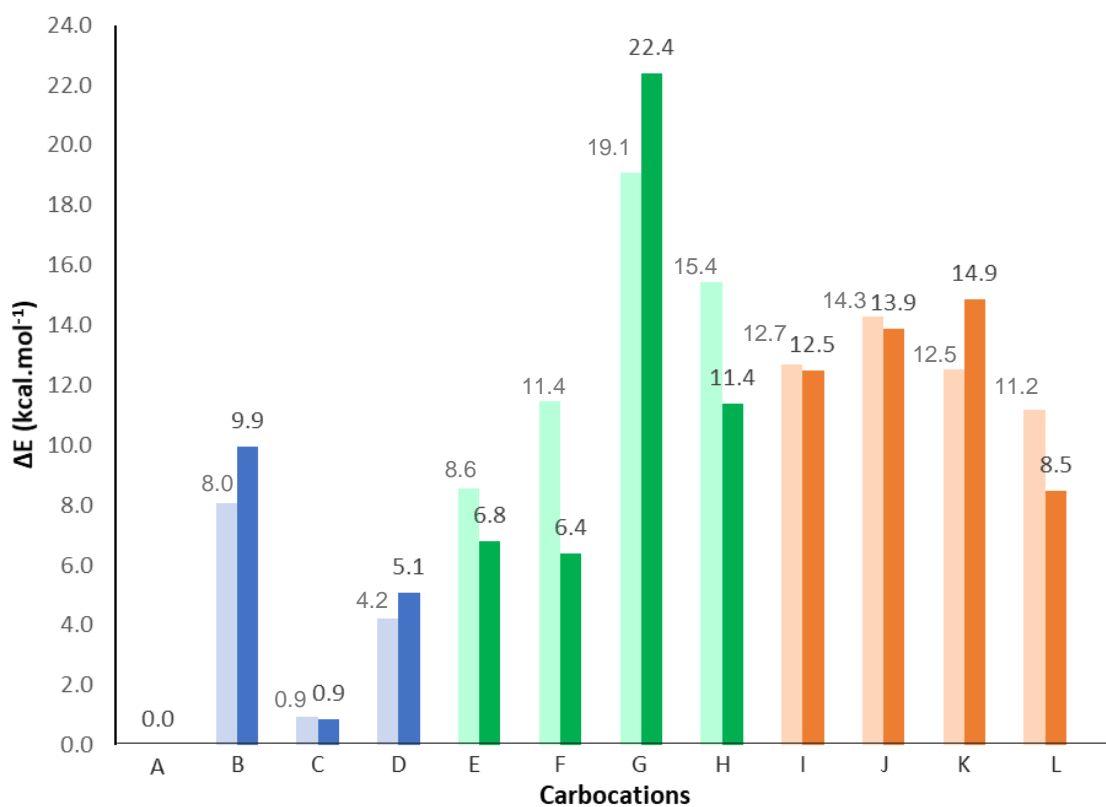

**Figure S1:** Relative electronic energy bar plots for germacrene A and hedycaryol carbocations with respect to **A** and **A-OH** cations, respectively. Germacrene A carbocations are shown in light color shades and hedycaryol carbocations are represented by dark shades. 6-6 bicyclic molecules are colored in blue; 5-7 bicyclics with the carbocation present on the seven membered ring in green, and 5-7 bicyclics with the carbocation on the five membered ring in orange.

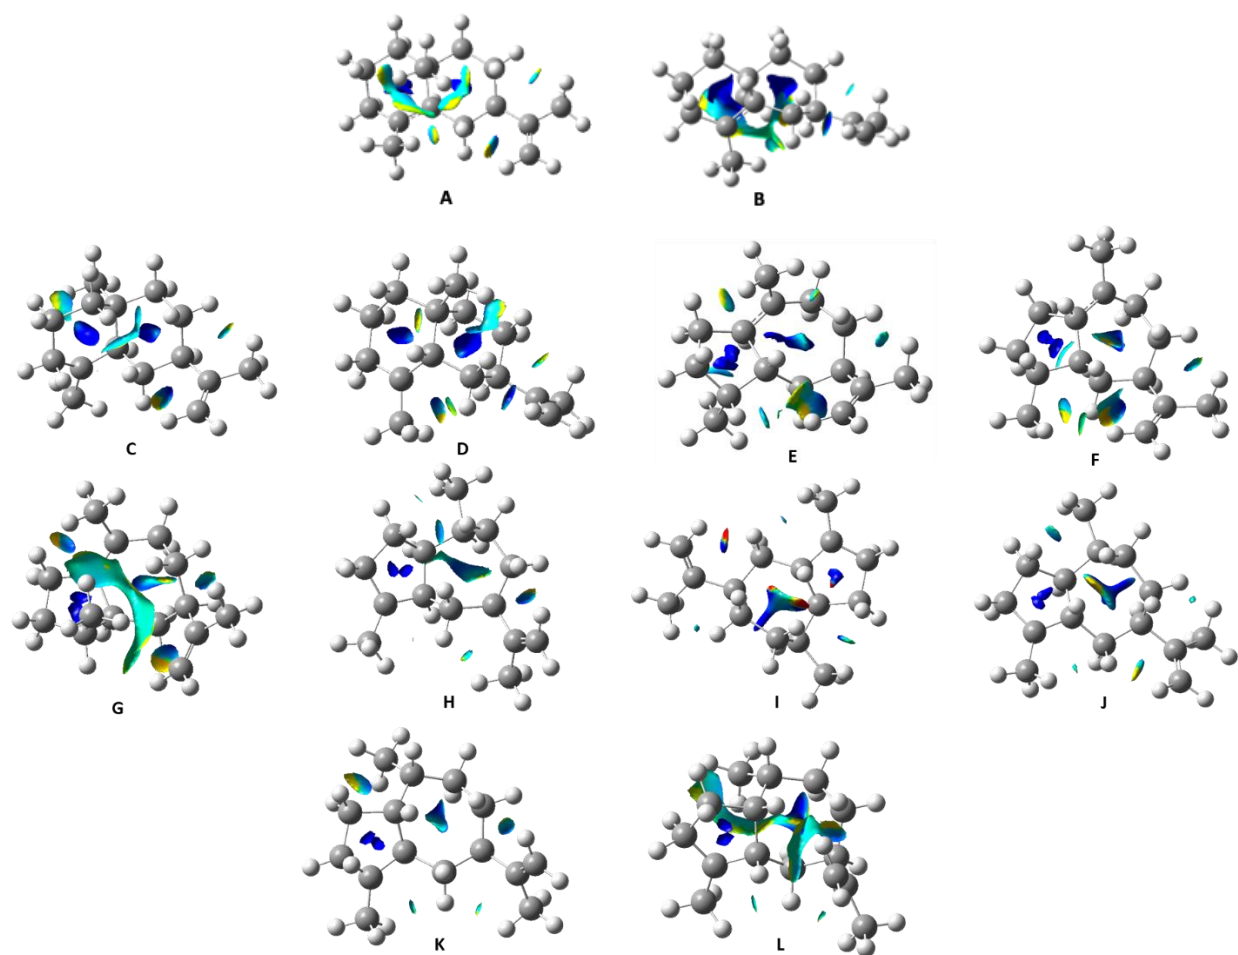

**Figure S2:** NCI plots for carbocations derived from germacrene A.

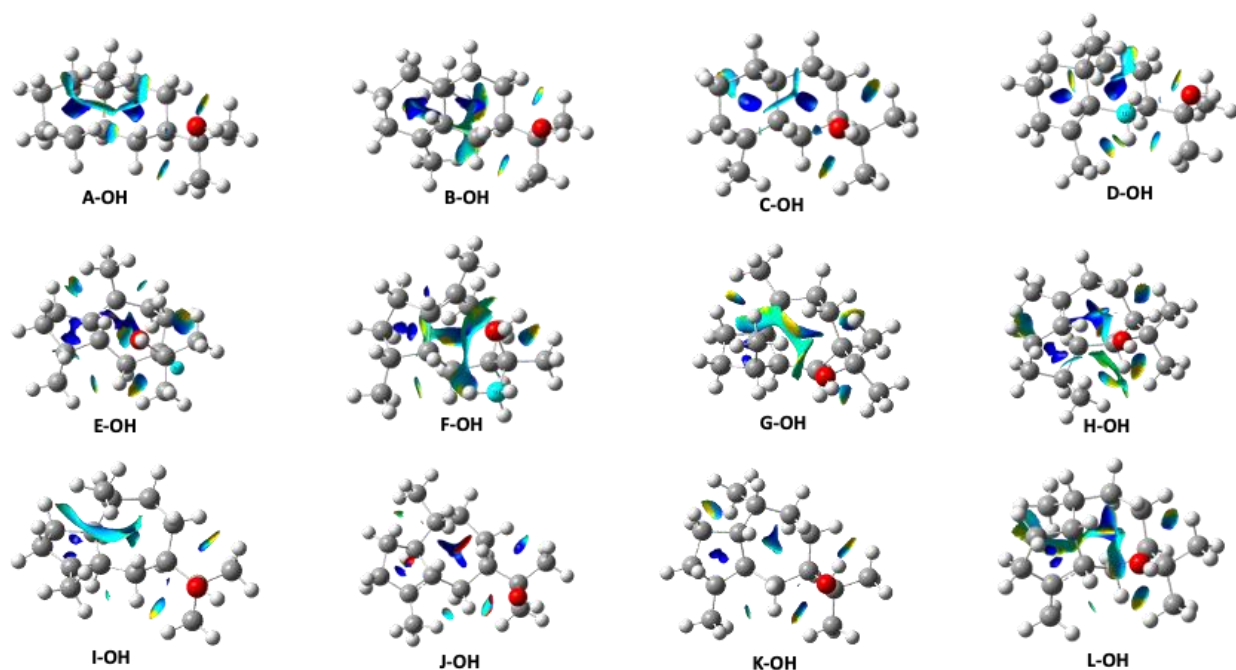

**Figure S3:** NCI plots for carbocations derived from hedycaryol.

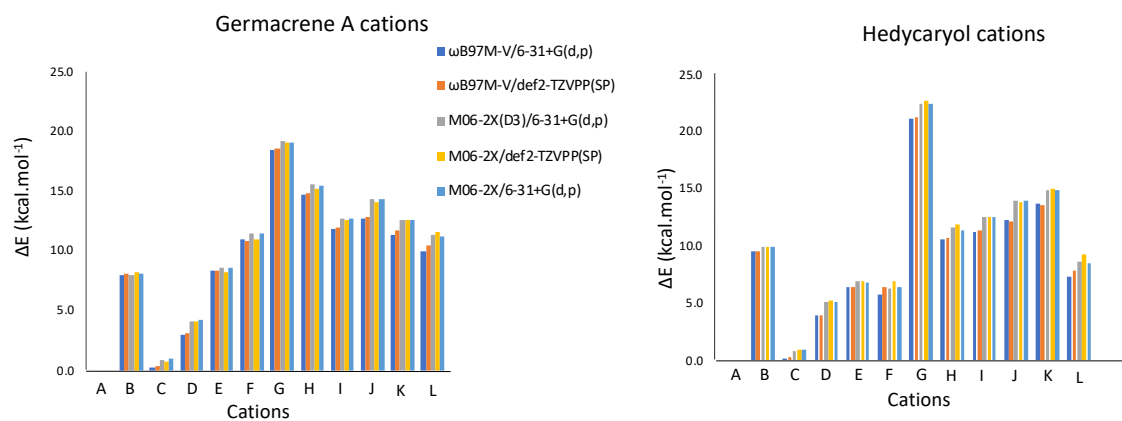

**Figure S4:** Comparison of energy trends with five different methods tested in this study for both germacrene A and hedycaryol carbocations.



H 1.4131610000 3.6128680000 -0.0696850000  
H -0.1233240000 2.8068580000 -0.4635110000  
H 0.3129160000 2.9966480000 1.2183950000  
H 3.3181040000 1.7902220000 0.2137850000  
H 2.6894260000 2.1612100000 -1.3534600000  
H 2.6981560000 -0.2096650000 -2.0103390000  
H 4.2031260000 0.0383030000 -1.1536130000  
H 3.2881830000 -0.8973540000 0.9222210000  
H 3.0186790000 -2.0429620000 -0.3801880000  
H 1.3581800000 -3.0933410000 1.0783920000  
H 1.5663620000 -1.8572530000 2.3240490000  
H -0.0462500000 -2.2346650000 1.7013210000  
H 0.6587930000 -0.7449320000 -1.7548660000  
H 0.6687680000 -2.4361930000 -1.2678840000  
H -1.6204280000 -1.5573040000 -1.6733780000  
H -1.4684940000 -2.0866470000 -0.0071070000  
H -1.2365400000 0.7764690000 -1.0188220000  
H -3.4014880000 0.5340340000 -2.1865020000  
H -3.8488460000 -1.0812670000 -1.6365470000  
H -4.8674620000 0.2978710000 -1.2189430000  
H -3.1060400000 0.5973240000 2.0105370000  
H -4.7245800000 0.5366370000 1.0535600000  
H -1.0219420000 -0.3031500000 1.8381300000  
H -1.0561640000 1.3925010000 1.4192570000

**E**

C -2.2702030000 -1.8062550000 -1.1152440000  
C -2.6975090000 -0.8417440000 -0.2958210000  
C -1.8211220000 -0.1681100000 0.7512940000  
C -0.4568600000 -0.8507670000 0.9665150000  
C 0.6360590000 -0.4764660000 -0.0274720000  
C 1.7414620000 -1.5236080000 -0.3167170000  
C 2.2663360000 -2.2096670000 0.9430330000  
C 2.8208160000 -0.7159460000 -1.0417360000  
C 2.9665530000 0.5683540000 -0.2021750000  
C 1.6203590000 0.7628500000 0.5102810000  
C 0.6920120000 1.7671070000 0.1235380000  
C 0.8103960000 2.4726840000 -1.1719360000  
C -0.4832150000 2.0768250000 0.9737470000  
C -1.7352400000 1.3414720000 0.4072760000  
C -4.1144710000 -0.3287840000 -0.3602830000  
H -1.2624360000 -2.2094430000 -1.0885320000  
H -2.9394950000 -2.2457600000 -1.8476950000  
H -2.3553210000 -0.2478970000 1.7075150000  
H -0.6164470000 -1.9324430000 0.9090540000  
H -0.1017680000 -0.6673440000 1.9865760000  
H 0.1914590000 -0.2091190000 -0.9960920000  
H 1.2978350000 -2.2778320000 -0.9792230000  
H 1.4825830000 -2.7638860000 1.4647610000  
H 2.7053630000 -1.4984850000 1.6514060000  
H 3.0486940000 -2.9227830000 0.6713240000  
H 2.4846360000 -0.4733870000 -2.0562390000  
H 3.7628500000 -1.2613070000 -1.1325470000  
H 3.7385380000 0.4535340000 0.5619740000  
H 3.2520350000 1.4339750000 -0.8403990000  
H 1.6559080000 0.6158290000 1.5909760000  
H 1.4422730000 3.3516950000 -0.9629910000  
H 1.3245470000 1.8869630000 -1.9358010000  
H -0.1481270000 2.8421730000 -1.5394680000  
H -0.3133820000 1.8052590000 2.0179520000  
H -0.6681870000 3.1552690000 0.9110340000  
H -2.6127440000 1.8574050000 0.8024670000  
H -1.7642290000 1.4765940000 -0.6804080000  
H -4.1544940000 0.7148680000 -0.6916650000  
H -4.7153830000 -0.9193690000 -1.0532530000  
H -4.5869510000 -0.3722660000 0.6274710000

**F**

C 4.0376510000 -0.4485930000 -0.1177780000  
C 2.7903550000 0.3993620000 -0.0558940000  
C 1.6272530000 -0.2160500000 0.7092370000  
C 0.3796250000 0.6745860000 0.8140690000  
C -0.5003550000 0.7124680000 -0.4416590000  
C -1.5438670000 1.8567600000 -0.4258640000  
C -1.0155350000 3.2576050000 -0.1444890000  
C -2.5927760000 1.3653260000 0.5843300000  
C -2.6540810000 -0.1779180000 0.4618720000  
C -1.4507590000 -0.4900720000 -0.5804540000  
C -1.1258520000 -1.8492160000 -0.2259500000  
C -1.9344920000 -2.9408630000 -0.7240510000  
C -0.0108640000 -2.2170150000 0.6708560000  
C 1.3123790000 -1.6073910000 0.1274900000  
C 2.7504180000 1.6074530000 -0.6236040000  
H 4.8807680000 0.1261980000 -0.5036750000  
H 4.3065910000 -0.8239370000 0.8763980000  
H 3.9056840000 -1.3190780000 -0.7700700000  
H 1.9848880000 -0.3817270000 1.7373770000  
H 0.7123570000 1.6859270000 1.0577110000  
H -0.2224170000 0.3623650000 1.6773130000  
H 0.1344730000 0.7816110000 -1.3331600000  
H -2.0101510000 1.8691900000 -1.4207830000

H -0.2295060000 3.5343560000 -0.8533930000  
H -0.6173910000 3.3500920000 0.8699380000  
H -1.8207210000 3.9899970000 -0.2458690000  
H -3.5778120000 1.8012930000 0.4007670000  
H -2.2940120000 1.6425090000 1.5999110000  
H -2.4987330000 -0.6636730000 1.4297290000  
H -3.5897040000 -0.5522740000 0.0449800000  
H -1.9344920000 -0.4756500000 -1.5637780000  
H -2.8103660000 -2.6021890000 -1.3471760000  
H -1.2630050000 -3.4736140000 -1.4898140000  
H -2.1979520000 -3.6769460000 -0.0272850000  
H -0.2047350000 -1.8164990000 1.6756430000  
H 0.0459610000 -3.3036850000 0.7625320000  
H 2.1106600000 -2.3119820000 0.3720880000  
H 1.2780760000 -1.5554820000 -0.9690130000  
H 1.8772650000 2.2508400000 -0.5922800000  
H 3.6196730000 2.0034150000 -1.1388860000

**G**

C 2.7241270000 -1.7480730000 0.1188550000  
C 2.7151320000 -0.4155800000 0.0432010000  
C 1.6917530000 0.3892300000 -0.7476930000  
C 0.6477240000 -0.4189050000 -1.5488680000  
C -0.7333200000 -0.7984690000 -1.0021570000  
C -0.9571550000 -1.7443020000 0.1918250000  
C -2.4930190000 -1.8403260000 0.2061480000  
C -3.0013100000 -0.4080020000 -0.1119170000  
C -1.8064010000 0.3553090000 -0.7250990000  
C -1.2783130000 1.5320930000 -0.0319350000  
C -1.8774120000 2.0984720000 1.1892570000  
C -0.1179810000 2.2384200000 -0.5755370000  
C 1.0913220000 1.5003760000 0.1298080000  
C 3.7889020000 0.4084960000 0.7115140000  
H 1.9685130000 -2.3752700000 -0.3428630000  
H 3.5096700000 -2.2643530000 0.6614990000  
H 2.2838010000 0.9143180000 -1.5130960000  
H 1.1229590000 -1.3474190000 -1.8782230000  
H 0.4558410000 0.1249820000 -2.4818850000  
H -2.8757230000 -2.2041680000 1.1623820000  
H -2.8324990000 -2.5356700000 -0.5664230000  
H -3.8272750000 -0.4308010000 -0.8258490000  
H -3.3910320000 0.0817610000 0.7815460000  
H -2.7102680000 2.7208730000 0.8119010000  
H -2.3183530000 1.3656510000 1.8628520000  
H -1.1933920000 2.7669470000 1.7145310000  
H -0.0175420000 2.1491510000 -1.6577330000  
H -0.1235280000 3.2891920000 -0.2805080000  
H 1.8346300000 2.2742610000 0.3332100000  
H 0.7896120000 1.1042640000 1.1064110000  
H 3.3944090000 0.9728550000 1.5644780000  
H 4.5941930000 -0.2267600000 1.0829120000  
C -0.4295890000 -1.2749700000 1.5449930000  
H -0.6703530000 -2.0190690000 2.3092230000  
H 0.6518390000 -1.1321880000 1.5482260000  
H -0.9095810000 -0.3406350000 1.8630230000  
H -0.5091230000 -2.7159500000 -0.0481250000  
H -1.2033560000 -1.3147390000 -1.8484520000  
H -2.0312600000 0.7660790000 -1.3732100000  
H 4.2210520000 1.1340720000 0.0124100000

**H**

C -2.1543500000 1.7818420000 0.7205940000  
C -2.6171320000 0.6397200000 0.2080340000  
C -1.8240590000 -0.2714910000 -0.7178960000  
C -0.5757390000 0.3673440000 -1.3952130000  
C 0.8420980000 0.1862940000 -0.8124120000  
C 1.8288240000 1.3989940000 -0.7410700000  
C 2.9151090000 0.9404230000 0.2404340000  
C 2.1377040000 0.2936710000 1.4002480000  
C 0.8881540000 -0.3289370000 0.7724140000  
C 0.9404990000 -1.6337720000 0.2093560000  
C 2.2099180000 -2.4008800000 0.0894740000  
C -0.2915210000 -2.3317490000 -0.2654140000  
C -1.6079710000 -1.6275030000 0.0221470000  
C -4.0041470000 0.1407850000 0.5267330000  
H -1.1742610000 2.1744090000 0.4810640000  
H -2.7661660000 2.3798960000 1.3881780000  
H -2.4971310000 -0.4863950000 -1.5570390000  
H -0.7748650000 1.4373560000 -1.4859710000  
H -0.5351420000 -0.0059460000 -2.4221750000  
H 3.5372680000 1.7734340000 0.5756650000  
H 3.5842720000 0.2199480000 -0.2411030000  
H 2.7278750000 -0.4430800000 1.9518670000  
H 1.8219590000 1.0477090000 2.1238770000  
H 3.1042370000 -1.7816550000 0.0751090000  
H 2.2540380000 -3.0159420000 1.0014260000  
H 2.1982990000 -3.0843160000 -0.7616920000  
H -0.1584150000 -2.5522830000 -1.3347480000  
H -0.2681970000 -3.3193660000 0.2191640000  
H -2.4180960000 -2.3126740000 -2.2386700000  
H -1.6872740000 -1.4765040000 1.1049500000

H -3.9836140000 -0.8300420000 1.0336880000  
H -4.5377800000 0.8425420000 1.1692330000  
C 1.2104080000 2.7184430000 -0.2864180000  
H 1.9874460000 3.4873800000 -0.3079260000  
H 0.4040310000 3.0601420000 -0.9387170000  
H 0.8318630000 2.6657820000 0.7387290000  
H 2.2400230000 1.5338980000 -1.7476530000  
H 1.3774140000 -0.5276040000 -1.4588160000  
H -0.0711740000 -0.0346540000 1.1999540000  
H -4.5833750000 0.0094580000 -0.3942620000

**I**

C -0.7565360000 3.3958880000 0.0479510000  
C -1.2768150000 2.0247370000 0.0083060000  
C -2.5249410000 1.6450500000 -0.6665740000  
C -2.5414420000 0.1109340000 -0.6828850000  
C -1.6843360000 -0.2675770000 0.5450160000  
C -0.6308170000 0.8645600000 0.5914000000  
C 0.6172930000 0.6732980000 -0.3852980000  
C 1.5190260000 -0.4734690000 0.0260260000  
C 2.9690920000 -0.0360670000 0.0202580000  
C 3.4399230000 0.9005790000 1.1035170000  
C 3.7735620000 -0.4257290000 -0.9717120000  
C 1.1874310000 -1.8229200000 -0.4835470000  
C -0.3088650000 -2.1547300000 -0.5837850000  
C -1.1978730000 -1.7312040000 0.5986060000  
C -2.4229250000 -2.6502690000 0.6841150000  
H -0.3766660000 3.6330440000 -0.9587000000  
H 0.0445740000 3.5334700000 0.7743740000  
H -1.5726460000 4.1061330000 0.2203670000  
H -2.7226510000 2.1827410000 -1.5995050000  
H -3.2826410000 2.0201130000 0.0548700000  
H -2.0970560000 -0.2499630000 -1.6148340000  
H -3.5551260000 -0.2869610000 -0.6261110000  
H -2.3132790000 -0.1185970000 1.4351960000  
H 0.2905270000 0.4530170000 -1.4077780000  
H 1.826070000 1.6089580000 -0.4118030000  
H 1.3225800000 -0.5548240000 1.2339900000  
H 4.4398620000 1.2862830000 0.8989080000  
H 2.7654180000 1.7598050000 1.2182210000  
H 3.4614370000 0.3844430000 2.0700610000  
H 4.7964240000 -0.0655940000 -1.0232840000  
H 3.4654950000 -1.1156190000 -1.7490730000  
H 1.6067360000 -1.8681790000 -1.4930140000  
H 1.7031700000 -2.5940450000 0.0986120000  
H -0.7196890000 -1.7415960000 -1.5127440000  
H -0.3971210000 -3.2393800000 -0.7027010000  
H -0.6265360000 -1.8508370000 1.5301590000  
H -2.9650560000 -2.6694090000 -0.2679660000  
H -2.1157940000 -3.6749830000 0.9052920000  
H -3.1180120000 -2.3318240000 1.4622520000  
H -0.1872310000 1.0715360000 1.5717110000

**J**

C 1.6875050000 3.1384230000 0.1889740000  
C 1.8770320000 1.6973140000 0.0174020000  
C 3.1665490000 1.0441000000 -0.2412000000  
C 2.8831920000 -0.4613520000 -0.1367440000  
C 1.4163050000 -0.5731970000 -0.5906800000  
C 0.8143900000 0.7132640000 0.0052260000  
C -0.6261260000 1.1505560000 0.2434110000  
C -1.6021730000 -0.0304080000 -0.1482300000  
C -3.0586380000 0.4121480000 -0.1963310000  
C -3.9723180000 -0.5239510000 -0.9430290000  
C -3.5157410000 1.5143530000 0.4016230000  
C -1.3751600000 0.9422060000 1.0793920000  
C -0.0629130000 -1.7791040000 1.1177170000  
C 0.6875340000 -1.8921870000 -0.2153790000  
C 1.6518940000 -3.0827670000 -0.2177770000  
H 2.6148500000 3.6824960000 0.3632130000  
H 0.9441330000 3.3501630000 0.9649910000  
H 1.2264720000 3.4977530000 -0.7472940000  
H 4.0018830000 1.4640900000 0.3269870000  
H 3.3586890000 1.3135020000 -1.3016490000  
H 2.9853480000 -0.7785880000 0.9086330000  
H 3.5715940000 -1.0561880000 0.3766930000  
H 1.3832260000 -0.4458720000 -1.6825740000  
H -0.9005690000 1.8950980000 0.5514230000  
H -0.7014400000 1.6420350000 -1.1812950000  
H -1.4370920000 -0.6276010000 -1.0535280000  
H -5.0174910000 -0.2252290000 -0.8493020000  
H -3.7133540000 -0.5447950000 -2.0078110000  
H -3.8760700000 -1.5505100000 -0.5708360000  
H -4.5711300000 1.7650930000 0.3698940000  
H -2.8794500000 2.2011730000 0.9514970000  
H -1.4660900000 -0.3237930000 1.1921410000  
H -2.2227500000 -1.6324850000 1.1821810000  
H 0.6259440000 -1.3965060000 1.8858070000  
H -0.3093240000 -2.7905540000 1.4540160000  
H -0.0492000000 -2.0892660000 1.0005080000  
H 2.3655970000 -3.0306790000 0.6109630000

H 1.092357000 -4.014854000 -0.110162000  
H 2.215607000 -3.143494000 -1.153863000  
H 0.924736000 0.529069000 1.155551000

**K**

C 3.856274000 -0.972668000 -0.850980000  
C 3.093112000 -0.141971000 0.147660000  
C 3.601822000 0.184643000 1.338201000  
C 1.699457000 0.291261000 -0.285893000  
C 0.742388000 -0.864270000 0.063523000  
C -0.755392000 -0.580703000 -0.286980000  
C -1.445536000 0.488899000 0.593781000  
C -2.870409000 -0.058026000 0.797396000  
C -2.659888000 -1.581664000 0.804012000  
C -1.551213000 -1.799842000 -0.128438000  
C -1.240676000 -3.086479000 -0.751499000  
C -1.342145000 1.938179000 0.079841000  
C -2.388232000 2.289374000 -0.981314000  
C 0.058947000 2.263698000 -0.470723000  
C 1.264682000 1.659154000 0.265361000  
H 4.070968000 -0.384894000 -1.750486000  
H 4.803209000 -1.323578000 -0.437458000  
H 3.283522000 -1.850570000 -1.173615000  
H 3.064388000 0.802284000 2.051510000  
H 4.592178000 -0.148382000 1.632303000  
H 1.712259000 0.377789000 -1.383428000  
H 1.082684000 -1.770830000 -0.447448000  
H 0.793527000 -1.054425000 1.143445000  
H -0.799853000 -0.333949000 -1.367885000  
H -0.936186000 0.443138000 1.566851000  
H -3.341316000 0.301155000 1.713806000  
H -3.521582000 0.202383000 -0.041568000  
H -3.523466000 -2.233593000 0.652555000  
H -2.207491000 -1.880738000 1.776080000  
H -0.715106000 -3.674513000 0.022716000  
H -2.145483000 -3.649679000 -0.992944000  
H -0.571754000 -2.999858000 -1.608625000  
H -1.518463000 2.580661000 0.951926000  
H -3.404366000 2.315084000 -0.580365000  
H -2.177532000 3.279130000 -1.395128000  
H -2.366432000 1.580333000 -1.819607000  
H 0.153719000 3.353839000 -0.485356000  
H 0.102873000 1.958451000 -1.527255000  
H 2.120021000 2.331193000 0.151682000  
H 1.070532000 1.602061000 1.344603000

**L**

C 1.458657000 2.653251000 -1.147544000  
C 1.476273000 1.574701000 -0.154821000  
C 2.641075000 1.248089000 0.678157000  
C 2.194697000 0.107016000 1.605396000  
C 0.953277000 -0.512337000 0.922119000  
C 0.370623000 0.675363000 1.028819000  
C -0.620733000 0.409136000 -1.023824000  
C -1.805168000 -0.485102000 -0.591085000  
C -2.706379000 0.321826000 0.331704000  
C -3.748829000 1.156265000 -0.366485000  
C -2.575212000 0.343366000 1.663985000  
C -1.380244000 -1.878271000 -0.064151000  
C -0.306959000 -2.372114000 -0.603751000  
C 1.238751000 -1.761996000 0.067191000  
C 2.345085000 -1.549435000 -0.969615000  
H 1.538305000 2.165190000 -2.133784000  
H 2.283219000 3.356482000 -1.035185000  
H 0.491862000 3.167155000 -1.158519000  
H 3.072072000 2.139257000 1.151155000  
H 3.407282000 0.925009000 -0.052323000  
H 1.921054000 0.520949000 2.580057000  
H 2.988560000 -0.623854000 1.773206000  
H 0.233397000 -0.795609000 1.690661000  
H -0.166858000 1.318561000 0.865854000  
H -1.016846000 1.359187000 -1.399566000  
H -0.084456000 -0.060618000 -1.855176000  
H -2.366945000 -0.652968000 -1.519380000  
H -3.311733000 1.763409000 -1.167878000  
H -4.492177000 0.503842000 -0.837895000  
H -4.266956000 1.822050000 0.325635000  
H -3.216106000 0.971674000 2.274875000  
H -1.872115000 -0.287692000 2.199546000  
H -1.376902000 -1.902037000 1.028399000  
H -2.157476000 -2.589063000 -0.358530000  
H 0.017908000 -3.458086000 -0.479689000  
H 0.007388000 -2.202786000 -1.684026000  
H 1.612083000 -2.500973000 0.788132000  
H 3.311666000 -1.320201000 -0.509565000  
H 2.481002000 -2.454489000 -1.567436000  
H 2.095707000 -0.742951000 -1.675384000

*Hedycaryl carbocations:*

**A-OH**

C 1.917940000 2.249305000 0.860820000  
C 2.000829000 1.269690000 -0.231642000  
C 3.293008000 1.015201000 -0.875763000  
C 3.775851000 -0.332018000 -0.210297000  
C 2.706638000 -1.402027000 -0.381455000  
C 1.332159000 -0.989507000 0.157845000  
C 1.335253000 -0.864947000 1.683538000  
C 0.893516000 0.421915000 -0.593027000  
C -0.520721000 0.855524000 -0.213388000  
C -1.574242000 -0.210175000 -0.554365000  
C -2.974307000 0.246699000 -0.071033000  
C -4.026855000 -0.837132000 -0.312465000  
C -1.181161000 -1.569192000 0.041933000  
C 0.249199000 -1.977031000 -0.305811000  
H 2.890331000 2.465851000 1.307650000  
H 1.570023000 3.177791000 0.370854000  
H 1.167208000 2.002708000 1.612773000  
H 4.021601000 1.806096000 -0.689422000  
H 3.181592000 0.835139000 -1.948345000  
H 4.709356000 -0.608406000 -0.705845000  
H 4.010459000 -0.155295000 0.843587000  
H 2.616069000 -1.661738000 -1.443624000  
H 3.017144000 -2.314386000 0.141390000  
H 0.407931000 -0.434051000 2.068482000  
H 1.424748000 -1.868415000 2.111287000  
H 2.170371000 -0.272325000 2.067397000  
H 0.960805000 0.146530000 -1.652641000  
H -0.599581000 1.082276000 0.853607000  
H -0.737047000 1.782740000 -0.754230000  
H -1.627231000 -0.311404000 -1.649199000  
H -5.020045000 -0.456003000 -0.054030000  
H -4.052326000 -1.135040000 -1.365600000  
H -3.836244000 -1.719103000 0.301956000  
H -1.324870000 -1.539157000 1.127881000  
H -1.847690000 -2.346412000 -0.340379000  
H 0.480694000 -2.945313000 0.155563000  
H 0.341830000 -2.112638000 -1.391485000  
C -3.411435000 1.543922000 -0.757725000  
H -2.760648000 2.379179000 -0.490154000  
H -3.420707000 1.431284000 -1.846689000  
H -4.426395000 1.807067000 -0.444156000  
O -2.816866000 0.471831000 1.333118000  
H -3.676482000 0.667368000 1.725432000

**B-OH**

C -1.257673000 2.313550000 0.869400000  
C -1.810139000 1.286966000 -0.036390000  
C -3.281008000 1.127634000 -0.145619000  
C -3.687494000 -0.186375000 -0.814746000  
C -2.830821000 -1.365642000 -0.295957000  
C -1.438353000 -0.940685000 0.202691000  
C -1.444529000 -0.733135000 1.725078000  
C -0.331951000 -1.933960000 -0.185632000  
C 1.063984000 -1.555871000 0.322581000  
C 1.394844000 -0.050768000 0.199035000  
C 2.901338000 0.173918000 -0.081749000  
C 3.752130000 -0.495636000 1.000210000  
C 3.248423000 1.664020000 -0.156113000  
C 0.528727000 0.610594000 -0.886473000  
C -0.979551000 0.388819000 -0.755742000  
H -0.274881000 2.043086000 1.260294000  
H -1.942897000 2.586259000 1.673176000  
H -1.101755000 3.206206000 0.240470000  
H -3.638693000 1.992496000 -0.729672000  
H -3.724798000 1.257726000 0.849131000  
H -4.749192000 -0.369241000 -0.640445000  
H -3.571122000 -0.093994000 -1.898248000  
H -3.344787000 -1.872570000 0.526432000  
H -2.717803000 -2.099506000 -1.100132000  
H -1.527990000 -1.722505000 2.186033000  
H -0.530074000 -0.273649000 2.104002000  
H -2.300499000 -0.149012000 2.076485000  
H -0.628166000 -2.907733000 0.225644000  
H -0.326816000 -2.043939000 -1.276084000  
H 1.177536000 -1.871639000 1.364349000  
H 1.791914000 -2.122864000 -0.264242000  
H 1.203145000 0.440550000 1.162961000  
H 3.586972000 -1.574519000 0.192664000  
H 3.532136000 -0.076535000 1.987539000  
H 4.814368000 -0.323546000 0.799005000  
H 4.070318000 -0.399507000 -1.564283000  
H 4.332483000 1.791622000 -0.235540000  
H 2.798664000 2.134590000 -1.033158000  
H 0.719146000 1.687436000 -0.924658000  
H 0.848611000 0.208799000 -1.852693000  
H -1.434334000 0.074889000 -1.698064000  
O 3.131046000 -0.442195000 -1.347139000  
H 2.922591000 2.193948000 0.745884000

**C-OH**

C 2.125806000 2.554292000 -1.051761000  
C 1.904273000 1.336648000 -0.261241000  
C 2.522704000 1.229188000 1.070581000  
C 2.814136000 -0.194460000 1.572407000  
C 1.711771000 -1.177618000 1.175693000  
C 1.400148000 -1.140426000 -0.330802000  
C 2.632042000 -1.556807000 -1.146585000  
C 1.020106000 0.296644000 -0.750391000  
C -0.367106000 0.780047000 -0.128100000  
C -1.489372000 -0.198519000 -0.519020000  
C -2.820173000 0.280252000 0.126630000  
C -2.263590000 1.636549000 -0.429848000  
O -2.527871000 0.398434000 1.520626000  
C -3.933944000 -0.745998000 -0.092851000  
C -1.120255000 -1.629765000 -0.114006000  
C 0.228625000 -2.064610000 -0.686948000  
H 2.303878000 3.438472000 -0.434877000  
H 3.070476000 2.352575000 -1.589925000  
H 1.355466000 2.724431000 -1.805536000  
H 1.747375000 1.699505000 1.711419000  
H 3.381113000 1.905166000 1.145020000  
H 3.779245000 -0.514305000 1.693110000  
H 2.927737000 -0.163064000 2.658126000  
H 0.807274000 -0.967564000 1.757095000  
H 2.020529000 -2.193562000 1.442624000  
H 2.406022000 -1.563215000 -2.217707000  
H 2.952499000 -2.565006000 -0.866679000  
H 3.483357000 -0.882104000 -0.993573000  
H 0.901089000 0.375883000 -1.839717000  
H -0.304999000 0.819960000 0.962211000  
H -0.587955000 1.785755000 -0.494803000  
H -1.623423000 -0.159768000 -1.610045000  
H -4.227156000 1.917640000 0.005883000  
H -2.554244000 2.429426000 -0.182570000  
H -3.391763000 1.595089000 -1.516166000  
H -3.345503000 0.553388000 2.009224000  
H -3.731555000 -1.671286000 0.449412000  
H -4.057329000 -0.975711000 -1.156042000  
H -4.884745000 -0.341860000 0.269521000  
H -1.134588000 -1.704340000 0.979505000  
H -1.880380000 -2.321419000 -0.485096000  
H 0.469680000 -3.080800000 -0.351886000  
H 0.149841000 -2.112491000 -1.782292000

**D-OH**

C -0.997145000 0.305799000 -0.787308000  
C -1.629117000 1.466220000 -0.146779000  
C -1.008279000 2.799788000 -0.230665000  
C -2.955618000 1.384409000 0.481169000  
C -3.453557000 0.010303000 0.924322000  
C -2.995892000 -1.070826000 -0.048194000  
C -1.477480000 -1.083234000 -0.287513000  
C -1.177720000 -2.152007000 -1.347010000  
C -0.709991000 -1.374067000 1.016397000  
C 0.811685000 -1.302975000 0.874445000  
C 1.280424000 0.055512000 0.335277000  
C 2.812265000 0.112176000 0.106912000  
C 3.579236000 -0.378287000 1.236827000  
C 3.271410000 1.531269000 -0.244852000  
C 0.530742000 0.391996000 -0.967626000  
H -1.456420000 0.473077000 -1.782340000  
H -1.694783000 3.603966000 0.033645000  
H -0.178368000 2.792865000 0.496729000  
H -0.541730000 2.979021000 -1.202777000  
H -3.589011000 1.772806000 -0.347611000  
H -3.045995000 2.164961000 1.246644000  
H -3.090874000 -0.192844000 1.935572000  
H -4.543794000 0.034560000 0.087239000  
H -3.506583000 -0.936497000 -1.012541000  
H -3.299903000 -2.054169000 0.325336000  
H -1.529721000 -3.124301000 -0.989402000  
H -1.702444000 -1.932672000 -2.283453000  
H -0.114198000 -2.250872000 -1.569980000  
H -1.013156000 -0.645665000 1.784425000  
H -1.009202000 -2.36801000 1.388785000  
H 1.251418000 -1.482748000 1.858822000  
H 1.183137000 -2.094259000 0.139440000  
H 1.046679000 0.820669000 1.096143000  
H 3.290125000 1.079090000 2.234022000  
H 3.407705000 -1.442297000 1.599300000  
H 4.653701000 -0.229608000 1.188831000  
H 3.014170000 2.237831000 0.551984000  
H 4.359213000 1.553194000 -0.361683000  
H 0.831986000 -0.323025000 -1.735588000  
H 0.819650000 1.374084000 -1.345282000  
H 2.383190000 1.875089000 -1.186795000  
O 3.042804000 -0.762226000 -0.997172000  
H 3.991997000 -0.870126000 -1.133725000

**E-OH**

C 3.1597150000 -1.7874300000 -0.1993710000  
C 2.6089890000 -0.4253820000 -0.2299660000  
C 1.6112830000 0.1512110000 -0.8073940000  
C 0.3456630000 -0.7318250000 -0.9365050000  
C -0.7939140000 -0.4176580000 -0.0255590000  
C -1.7264700000 -1.5902210000 0.4331840000  
C -2.1141520000 -2.4869030000 -0.7413510000  
C -2.9378110000 -0.9019740000 1.0651550000  
C -3.2943010000 0.2231350000 0.0751240000  
C -1.9877140000 0.5889010000 -0.6349010000  
C -1.1898710000 1.6855110000 -0.2433000000  
C -1.4299770000 2.4130980000 1.0291360000  
C -0.0436340000 2.1354380000 -1.0820280000  
C 1.2938120000 1.6242360000 -0.4843060000  
C 3.7858070000 0.5248870000 0.4701740000  
H 3.8648000000 -2.1524650000 0.5541180000  
H 2.3785040000 -2.5422860000 -0.3052170000  
H 3.7022280000 -1.7071020000 -1.1459910000  
H 2.1208810000 0.1121390000 -1.7781200000  
H 0.6287470000 -1.7690570000 -0.7414350000  
H -0.0238950000 -0.7209510000 -1.9674090000  
H -0.3832830000 -0.0129630000 0.9835340000  
H -1.1683050000 -2.1780690000 1.1721130000  
H -1.2463530000 -2.9773780000 -1.1881140000  
H -2.6320120000 -1.9343490000 -1.5329400000  
H -2.7914390000 -3.2709160000 -0.3929010000  
H -2.6617840000 -0.4841990000 2.0399110000  
H -3.7707810000 -1.5891380000 1.2300970000  
H -4.0038350000 -0.1273410000 -0.6773790000  
H -3.7547210000 1.0862690000 0.5620540000  
H -1.9540200000 0.3715850000 -1.7024770000  
H -2.0854570000 3.2564910000 1.7622930000  
H -1.9518460000 1.8168130000 0.7727030000  
H -0.5127500000 2.8345110000 1.4442960000  
H -0.1570230000 1.8112710000 -2.1197030000  
H -0.0373380000 3.2312620000 -1.0591350000  
H 2.0897560000 2.2648770000 -0.8692400000  
H 1.2753050000 1.7647320000 0.6020820000  
H 3.4643630000 1.4664980000 0.9195940000  
H 4.5056100000 0.0600850000 1.1551261000  
H 4.3118760000 0.7403910000 -0.4653570000  
O 1.8336600000 -0.5631470000 1.4289480000  
H 2.3989490000 -0.8847860000 2.1423730000

F-OH

C -2.1793050000 2.0888160000 0.8563620000  
C -2.2294940000 0.6950410000 0.2272160000  
C -1.2829590000 0.5747620000 -0.9891060000  
C 0.1349330000 1.1514150000 -0.7769700000  
C 0.9399570000 0.7231840000 0.4659780000  
C 2.4288720000 1.1560150000 0.4000360000  
C 2.7075540000 2.0515276000 -0.2306870000  
C 3.1059620000 -0.2474990000 -0.2960360000  
C 2.5266420000 -1.2615650000 0.3946900000  
C 1.0347190000 -0.7852270000 0.8203970000  
C 0.3082420000 -1.7954130000 0.0982890000  
C -0.1643710000 -3.0004300000 0.7977110000  
C 0.0578150000 -1.6633300000 -1.3476950000  
C -1.2599480000 -0.8597430000 -1.5695650000  
C -3.6799870000 0.3960660000 -0.1644120000  
H -2.9021520000 2.1552450000 1.6757810000  
H -1.1948180000 2.3323440000 1.2576160000  
H -2.4502930000 2.8504250000 0.1187310000  
H -1.7373260000 1.2097970000 -1.7588640000  
H 0.0477250000 2.2408300000 -0.7148120000  
H 0.7118290000 0.9727790000 -1.6930140000  
H 0.4595870000 1.1836180000 1.3325410000  
H 2.7978660000 1.1784870000 1.4353930000  
H 2.1503230000 3.3094610000 0.2754180000  
H 2.4420340000 2.5342520000 -1.2917850000  
H 3.7704500000 2.7569070000 -0.1519700000  
H 4.1968110000 -0.0113350000 -0.2125540000  
H 2.8665130000 -0.0225300000 -1.3675670000  
H 2.5681710000 -2.1590250000 -0.2331310000  
H 3.0410810000 -1.5041280000 1.3268080000  
H 0.9217010000 -0.9315660000 1.8951000000  
H 0.3333860000 -3.1599350000 1.7553360000  
H -1.2202650000 -2.7607360000 1.0147160000  
H -0.1465860000 -3.8950090000 0.1735270000  
H 0.8827140000 -1.1283670000 -1.8240730000  
H -0.0515990000 -2.6439490000 -1.8154370000  
H -1.3817540000 -0.8262540000 -2.6552060000  
H -2.0854710000 -1.4568780000 -1.1776550000  
H -3.8042150000 -0.6035250000 -0.5854400000  
H -4.3239100000 0.4658750000 0.7185010000  
H -0.4262400000 1.1268280000 -0.8927560000  
O -1.7739260000 -0.2989390000 1.1668580000  
H -2.3495610000 -0.2825440000 1.9426790000

G-OH

C -3.6966700000 -0.3770130000 1.0351280000

C -2.6764180000 -0.0581600000 -0.0619620000  
C -1.4582020000 0.6848740000 0.5476840000  
C -0.5767950000 -0.2483260000 1.4117090000  
C 0.7810230000 -0.8046720000 0.9467070000  
C 0.9757790000 -1.8297410000 -0.1993400000  
C 2.4719130000 -2.1423850000 -0.0089800000  
C 3.1284080000 -0.7545240000 0.1655210000  
C 1.9847080000 0.1507280000 0.7241690000  
C 1.8233540000 1.4683150000 0.1281440000  
C 2.9812370000 2.1313060000 -0.4932940000  
C 0.5583660000 2.2294890000 0.1850590000  
C -0.6543300000 1.5024370000 -0.4648450000  
C -3.3578010000 0.7515300000 -1.1669660000  
H -4.5096790000 -0.9828010000 0.6216780000  
H -3.2488720000 -0.9375770000 0.8592270000  
H -4.1388580000 0.5398010000 1.4356410000  
H -1.8984660000 1.4209430000 1.2356450000  
H -1.1675730000 -1.1289010000 1.6764670000  
H -0.3735730000 0.2578340000 2.3649580000  
H 2.9037850000 -2.6802100000 -0.8560530000  
H 2.6256470000 -2.7518600000 0.8862160000  
H 3.9933930000 -0.7793380000 0.8309010000  
H 3.4731970000 -0.3834210000 -0.8026610000  
H 3.9431230000 1.7011410000 -0.2178040000  
H 2.8409340000 1.9664820000 -1.5788310000  
H 2.9578100000 3.2135610000 -0.3485080000  
H 0.3331990000 2.3916620000 1.2519370000  
H 0.7091170000 3.2145180000 -0.2603850000  
H -1.2781750000 2.2947220000 -0.8848860000  
H -0.3237490000 0.8883820000 -1.3050640000  
H -2.7028320000 0.8675620000 -2.0344020000  
H -4.2638750000 0.2351750000 -1.4994630000  
C 0.7362590000 -1.3484750000 -1.6306140000  
H 1.0495690000 -2.1301600000 -2.3289550000  
H -0.3141810000 -1.1302270000 -1.8515489000  
H 1.3396260000 -0.4603670000 -1.8736630000  
H 0.3468300000 -2.7043640000 -0.0072630000  
H 1.0974900000 -1.3755870000 1.8299890000  
H 2.2946460000 0.5680240000 1.7207520000  
H -3.6584330000 1.7419270000 -0.8094800000  
O -2.1583810000 -1.2732250000 -0.6060540000  
H -2.8880390000 -1.8034200000 -0.9507800000

H-OH

C -3.0166170000 -1.3789390000 0.5809210000  
C -2.4463470000 -0.1790100000 -0.1772100000  
C -1.5058930000 0.6831140000 1.7041240000  
C -0.3819720000 -0.0847430000 1.4586410000  
C 1.0276950000 -0.2684650000 0.8589060000  
C 1.6037940000 -1.7083840000 0.6903030000  
C 2.8429030000 -1.5114010000 -0.1879170000  
C 2.3587840000 -0.5996120000 -1.3276870000  
C 1.2427870000 0.2590480000 -0.7312710000  
C 1.5033880000 1.5099490000 -0.1299380000  
C 2.8864490000 2.0117450000 0.1015520000  
C 0.3849410000 2.4147880000 0.2756410000  
C -1.0204150000 1.9361650000 -0.0728190000  
C -3.6060290000 0.6775320000 -0.6971990000  
H -3.7778570000 -1.8746760000 -0.0293720000  
H -2.2467580000 -2.1186890000 0.8051840000  
H -3.4940140000 -1.0667400000 1.5149760000  
H -2.1584400000 1.0388240000 1.1510093000  
H -0.7545850000 -1.0761590000 1.7240180000  
H -0.2443800000 0.4278000000 2.4151370000  
H 3.2445600000 -2.4590860000 -0.5531450000  
H 3.6384010000 -1.0260380000 0.3890320000  
H 3.1601200000 0.0064950000 -1.7583330000  
H 1.9335390000 -1.1895770000 -2.1423470000  
H 3.6310570000 1.2185210000 0.1607510000  
H 3.1299230000 2.6247290000 -0.7786060000  
H 2.9466400000 2.6605900000 0.9775040000  
H 0.5007770000 2.6387020000 1.3459850000  
H 0.5996470000 3.3706360000 -0.2259910000  
H -1.7079270000 2.7650490000 0.1128720000  
H -1.0625520000 1.7447040000 -1.1498630000  
H -3.2573080000 1.5057550000 -1.3173660000  
H -4.2771230000 0.0632480000 -1.3061800000  
C 0.6096590000 -2.6921400000 0.0776480000  
H 1.1296890000 -3.6196650000 -0.1772310000  
H -0.1847700000 -2.9527230000 0.7805080000  
H 0.1356250000 -2.2942480000 -0.8239390000  
H 1.8874760000 -2.0544280000 1.6914400000  
H 1.7466340000 0.2249720000 1.5279480000  
H 0.2577700000 1.3268700000 -1.1780480000  
H -4.1950120000 1.0816070000 0.1318240000  
O -1.6565020000 -0.6385310000 -1.2833270000  
H -2.2279400000 -1.0821920000 -1.9229460000

I-OH

C 1.9429860000 2.5813060000 0.9594350000  
C 2.1198620000 1.4184090000 0.0891600000

C 3.4238620000 0.8450350000 -0.2683460000  
C 3.1220860000 -0.3250050000 -1.2182030000  
C 1.6393010000 -0.6902700000 -0.9647690000  
C 1.0305900000 0.6702860000 -0.5138670000  
C -0.3532640000 0.8087350000 0.1289550000  
C -1.3952160000 -0.2389460000 -0.3089390000  
C -2.8151910000 0.3650190000 -0.1065820000  
C -3.1062810000 1.4264150000 -1.1742710000  
C -3.9254350000 -0.6866140000 -0.1542190000  
C -1.1715170000 -1.5564820000 0.4524440000  
C 0.0056440000 -2.4117850000 -0.0296590000  
C 1.4268640000 -1.8324280000 0.0446220000  
C 1.8632880000 -1.4911570000 1.4724240000  
H 2.8545770000 3.1602200000 1.1036230000  
H 1.6215900000 2.1735810000 1.9343830000  
H 1.1072860000 3.2071530000 0.6307250000  
H 3.8498570000 0.5138470000 0.6963620000  
H 4.1227030000 1.6114810000 -0.6263200000  
H 3.7897630000 -1.1727970000 -1.0518190000  
H 3.2617280000 0.0029070000 -2.2526110000  
H 1.1700460000 -0.9949510000 -1.9048600000  
H -0.2601350000 0.7428570000 1.2186780000  
H -0.7275400000 1.8171850000 -0.0659540000  
H -1.2954810000 -0.4353890000 -1.3878600000  
H -4.0548830000 1.9249640000 -0.9527910000  
H -2.3350550000 2.1995810000 -1.3295460000  
H -3.1962080000 0.9653020000 -2.1626410000  
H -3.8488500000 -1.3076750000 -1.0525810000  
H -3.8999740000 -1.3308420000 0.7264710000  
H -1.0867370000 -1.3364140000 1.5247940000  
H -2.0541960000 -2.1900760000 0.3453290000  
H 0.0003730000 -3.3419510000 0.5498120000  
H -0.1839270000 -2.7056130000 -1.0709880000  
H 2.0854980000 -2.6393060000 -0.3055540000  
H 1.3702520000 -0.5911940000 1.8625230000  
H 1.6026450000 -2.3057640000 2.1536550000  
H 2.9467080000 -1.3522400000 1.4507050000  
H 1.0349490000 1.2803890000 -1.4624760000  
H -4.9010430000 -0.1902020000 -0.1805440000  
O -2.7702980000 0.9683610000 1.1891780000  
H -3.6570380000 1.2529540000 1.4419490000

J-OH

C -1.3560760000 3.2261470000 -0.2948260000  
C -1.8122470000 1.8451520000 -0.1076820000  
C -3.2220590000 1.4118380000 -0.1334700000  
C -3.1783600000 -0.1270680000 -0.1472120000  
C -1.8718640000 -0.4355780000 0.6009280000  
C -0.9594710000 0.7064920000 0.1163660000  
C 0.4698340000 0.8284980000 0.6088100000  
C 1.3621780000 -0.3874610000 0.2295180000  
C 2.8293760000 0.0965060000 0.0886300000  
C 3.3037130000 0.7700660000 1.3812790000  
C 3.7865430000 -1.0471280000 -0.2562120000  
C 0.8558710000 -1.0951860000 -1.0399480000  
C -0.4430570000 -1.9491430000 -0.8992280000  
C -1.2473100000 -1.8264230000 0.4043570000  
C -2.3194940000 -2.9152550000 0.4938980000  
H -2.1096460000 3.8711220000 -0.7453550000  
H -0.4127860000 3.2612670000 -0.4895230000  
H -1.1153540000 3.6067830000 0.7117820000  
H -3.8285910000 1.9193200000 -0.8887680000  
H -3.5995060000 1.7641470000 0.8484270000  
H -3.1226880000 -0.4824960000 -1.1840010000  
H -4.0608640000 -0.5704670000 0.1322960000  
H -2.0467920000 -0.2786420000 1.6765620000  
H 0.9255730000 1.7234880000 0.1719630000  
H 0.4403960000 0.9677040000 1.6957270000  
H 1.3614190000 1.1034690000 1.0596700000  
H 4.3406060000 1.1019240000 1.2699380000  
H 2.7025690000 1.6486660000 1.6265650000  
H 3.2688120000 0.0706820000 2.2228750000  
H 4.8216940000 -0.6974970000 -0.1841500000  
H 3.6746120000 -1.8806620000 0.4443990000  
H 0.7531580000 -0.3416090000 -1.8316880000  
H 1.6398030000 -1.7613060000 -1.4008290000  
H -1.1087780000 -1.7514870000 -1.1751250000  
H -0.1715960000 -3.0047950000 -0.9962140000  
H -0.5579020000 -1.9822600000 1.2423230000  
H -2.9976410000 -2.8765840000 -0.3656110000  
H -1.8599420000 -3.9063350000 0.5067330000  
H -2.9175590000 -2.8133670000 1.4050870000  
H -0.9229400000 0.5579000000 -1.0161320000  
H 3.6281740000 -1.4133820000 -1.2716770000  
O 2.7990150000 1.0524750000 -0.9758530000  
H 3.6981940000 1.3427580000 -1.1720410000

K-OH

C -3.2549740000 1.5411850000 -0.5203080000  
C -2.8423180000 0.2059310000 0.1036490000  
C -3.9369310000 -0.8263740000 -0.1722960000



|   |               |               |               |
|---|---------------|---------------|---------------|
| O | -2.7300900000 | 0.4513220000  | 1.5070750000  |
| C | -1.4512840000 | -0.2681160000 | -0.4318160000 |
| C | -0.4460200000 | 0.8711630000  | -0.1901470000 |
| C | 1.0637230000  | 0.5250870000  | -0.3738770000 |
| C | 1.6613060000  | -0.5012090000 | 0.6172450000  |
| C | 3.0811810000  | 0.0235860000  | 0.8970140000  |
| C | 2.9164550000  | 1.5475020000  | 0.7891490000  |
| C | 1.8736400000  | 1.7391600000  | -0.2189090000 |
| C | 1.6158520000  | 3.0056610000  | -0.9030340000 |
| C | 1.5588990000  | -1.9681660000 | 0.1574100000  |
| C | 2.6779110000  | -2.3963230000 | -0.7951050000 |
| C | 0.1997540000  | -2.2566140000 | -0.4998650000 |
| C | -1.0346640000 | -1.6240210000 | 0.1621560000  |
| H | -3.2007680000 | 1.5008450000  | -1.6132780000 |
| H | -4.2821210000 | 1.7749590000  | -0.2329650000 |
| H | -2.6278540000 | 2.3588400000  | -0.1578140000 |
| H | -4.9064680000 | -0.4115780000 | 0.1144770000  |
| H | -3.7901120000 | -1.7512330000 | 0.3926030000  |
| H | -3.9761880000 | -1.0823230000 | -1.2355060000 |
| H | -3.0205340000 | -0.3234690000 | 2.0017010000  |
| H | -1.5549810000 | -0.4078480000 | -1.5184310000 |
| H | -0.6939260000 | 1.6999540000  | -0.8581560000 |
| H | -0.5747310000 | 1.2218610000  | 0.8431000000  |
| H | 1.2218380000  | 0.2141950000  | -1.4286370000 |
| H | 1.0791720000  | -0.3935080000 | 1.5433910000  |
| H | 3.4694730000  | -0.2855620000 | 1.8686520000  |
| H | 3.7875840000  | -0.3068710000 | 0.1307240000  |
| H | 3.8055490000  | 2.1689420000  | 0.6583360000  |
| H | 2.4052150000  | 1.9233970000  | 1.7049620000  |
| H | 0.9411360000  | 3.5642040000  | -0.2277770000 |
| H | 2.5167480000  | 3.6105140000  | -1.0188270000 |
| H | 1.0793940000  | 2.8791250000  | -1.8452060000 |
| H | 1.6327170000  | -2.5825190000 | 1.0638000000  |
| H | 3.6546920000  | -2.4374990000 | -0.3071040000 |
| H | 2.4682320000  | -3.3952850000 | -1.1867680000 |
| H | 2.7533700000  | -1.7228380000 | -1.6591860000 |
| H | 0.0786530000  | -3.3438240000 | -0.5309660000 |
| H | 0.2396360000  | -1.9429480000 | -1.5542700000 |
| H | -1.8678630000 | -2.3152180000 | 0.0212090000  |
| H | -0.8923200000 | -1.5356010000 | 1.2477310000  |

**L-OH**

|   |               |               |               |
|---|---------------|---------------|---------------|
| C | -1.9988120000 | -2.4951490000 | -1.1748210000 |
| C | -1.8491880000 | -1.4556370000 | -0.1498400000 |
| C | -2.9031120000 | -1.0891370000 | 0.8098010000  |
| C | -2.2975050000 | 0.0038840000  | 1.7073980000  |
| C | -1.0843970000 | 0.5549140000  | 0.9227550000  |
| C | -0.6694840000 | -0.6497530000 | 0.0409380000  |
| C | 0.2995340000  | -0.4505380000 | -1.1232140000 |
| C | 1.5564500000  | 0.3670800000  | -0.7742870000 |
| C | 2.5325030000  | -0.3910880000 | 0.1582090000  |
| C | 2.9436890000  | -1.7484720000 | -0.4176760000 |
| C | 3.7823240000  | 0.4460270000  | 0.4319600000  |
| C | 1.2368730000  | 1.7921900000  | -0.2483270000 |
| C | -0.1238160000 | 2.3553330000  | -0.6776110000 |
| C | -1.3638260000 | 1.8284450000  | 0.1033110000  |
| C | -2.5661660000 | 1.6952810000  | -0.8344590000 |
| H | -2.1169470000 | -1.9667510000 | -2.1355710000 |
| H | -2.8623890000 | -3.1397440000 | -1.0145760000 |
| H | -1.0794250000 | -3.0806020000 | -1.2799410000 |
| H | -3.3276010000 | -1.9676820000 | 1.3110830000  |
| H | -3.7227020000 | -0.7084910000 | 0.1726190000  |
| H | -1.9621770000 | -0.4450600000 | 2.6466620000  |
| H | -3.0238220000 | 0.7800670000  | 1.9580100000  |
| H | -0.2668610000 | 0.7604330000  | 1.6137660000  |
| H | -0.1760440000 | -1.3530310000 | 0.7783070000  |
| H | 0.5936990000  | -1.4188060000 | -1.5386410000 |
| H | -0.2433440000 | 0.0667500000  | -1.9222550000 |
| H | 2.0884090000  | 0.4798180000  | -1.7282630000 |
| H | 2.0977020000  | -2.4400920000 | -0.4600580000 |
| H | 3.3640570000  | -1.6426570000 | -1.4226290000 |
| H | 3.7079830000  | -2.2083060000 | 0.2162690000  |
| H | 4.4762970000  | -0.1124450000 | 1.0690740000  |
| H | 4.3055510000  | 0.6760050000  | -0.5011950000 |
| H | 1.3141340000  | 1.8067140000  | 0.8436760000  |
| H | 2.0163800000  | 2.4688440000  | -0.6101400000 |
| H | -0.0991910000 | 3.4434590000  | -0.5678770000 |
| H | -0.2645890000 | 2.1807870000  | -1.7518790000 |
| H | -1.6208110000 | 2.5855610000  | 0.8558610000  |
| H | -3.5029290000 | 1.5227700000  | -0.2951050000 |
| H | -2.6948110000 | 2.6102100000  | -1.4188960000 |
| H | -2.4256960000 | 0.8789130000  | -1.5596490000 |
| H | 3.5364230000  | 1.3827270000  | 0.9354460000  |
| O | 1.8115190000  | -0.6039640000 | 1.3868010000  |
| H | 2.4261470000  | -0.9079610000 | 2.0666620000  |
